# Supplementary material for: Multiplexed imaging and automated signal quantification in formalin-fixed paraffin-embedded tissues by ChipCytometry
Source: PubMed Central journal article supplement (PMC9017205; doi:10.1016/j.crmeth.2021.100104), 2021-10-27
Supplement: mmc1.pdf [file mmc1.pdf]

**Cell Reports Methods, Volume 1**

**Supplemental information**

**Multiplexed imaging and automated  
signal quantification in formalin-fixed  
paraffin-embedded tissues by ChipCytometry**

**Sebastian Jarosch, Jan Köhlen, Rim S.J. Sarker, Katja Steiger, Klaus-Peter Janssen, Arne Christians, Christian Hennig, Ernst Holler, Elvira D'Ippolito, and Dirk H. Busch**

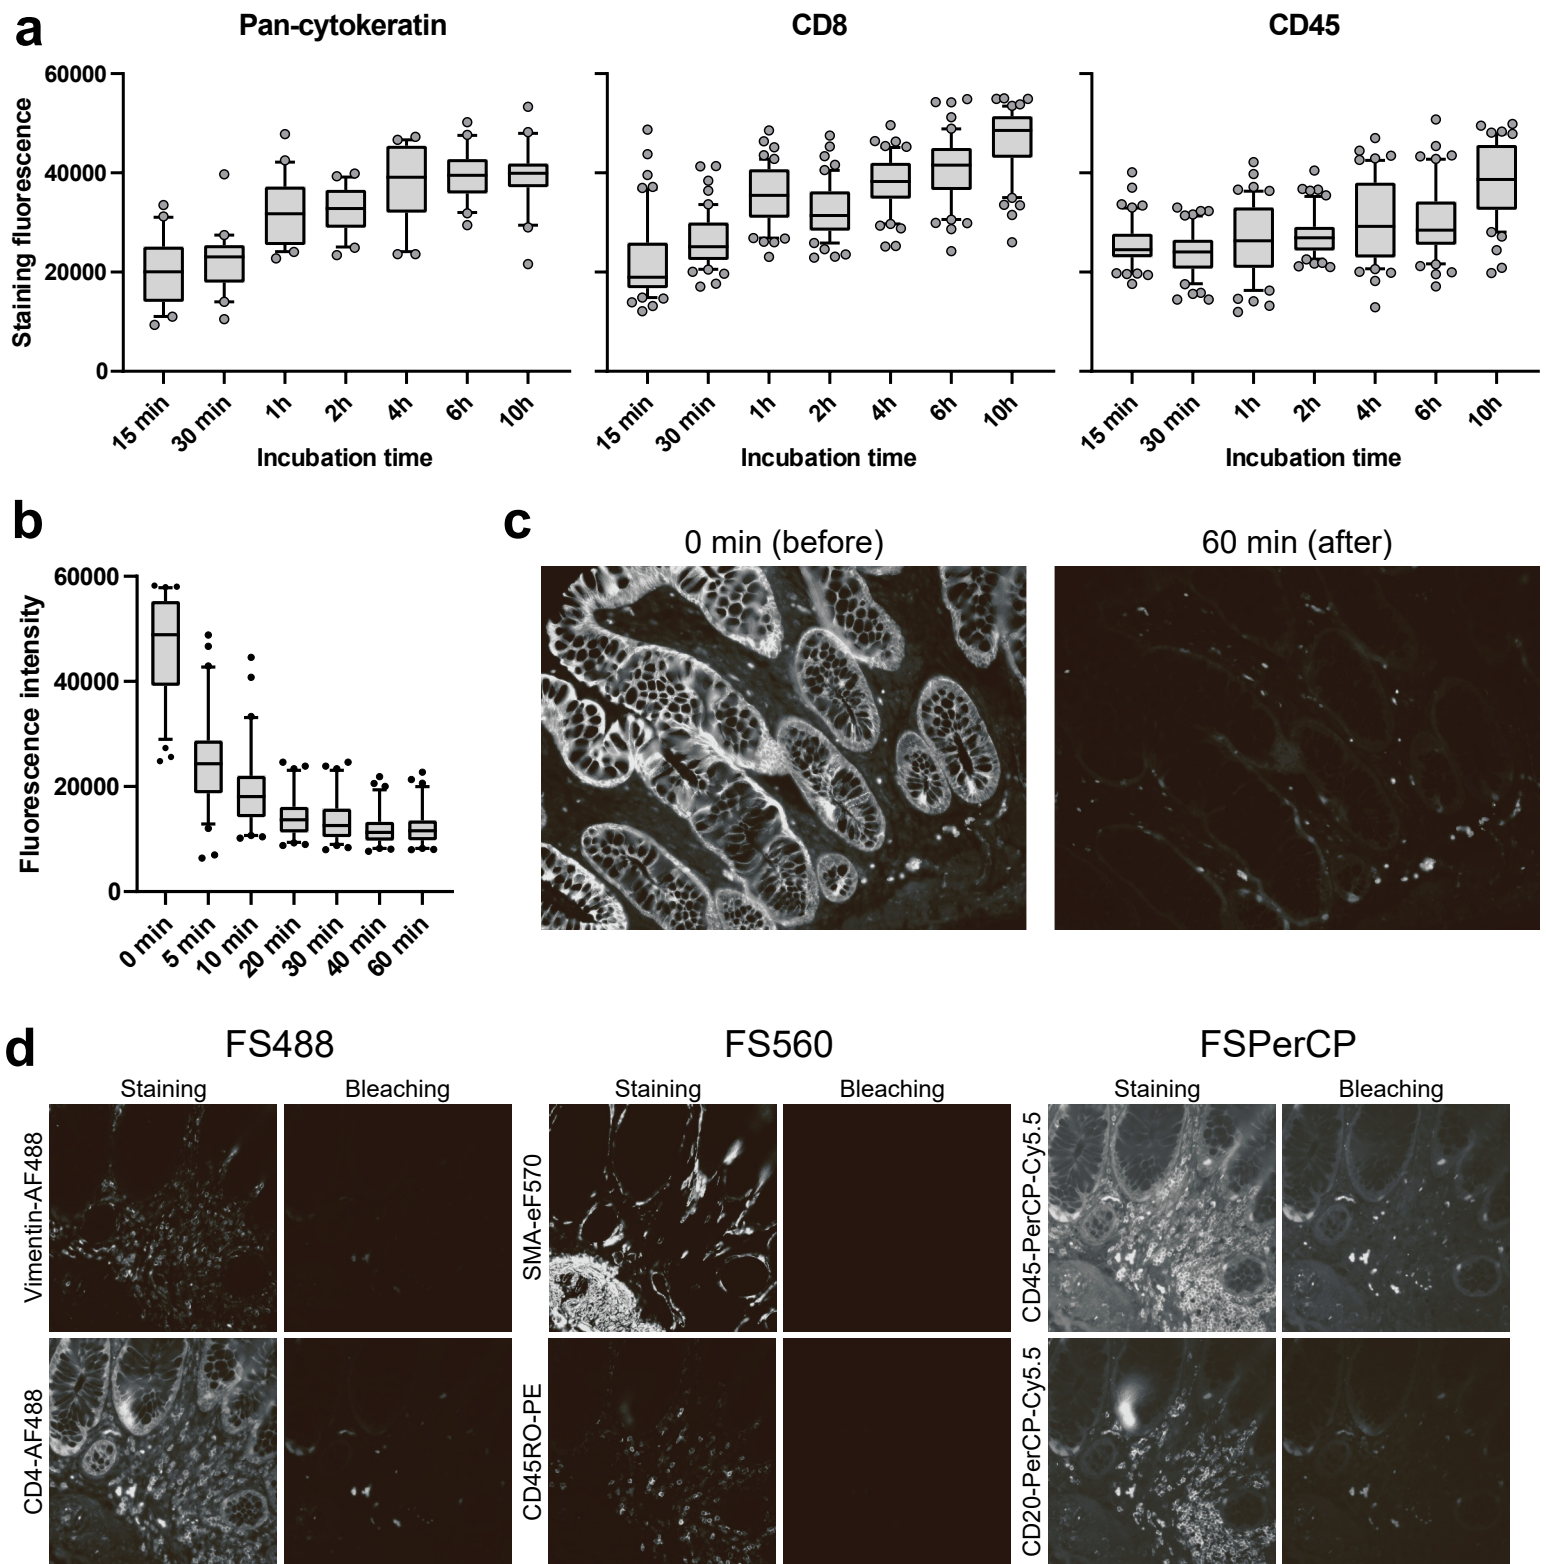

**Figure S1. Effects of antibody incubation and chemical bleaching on staining intensities (related to Figure 1).** FFPE healthy colon tissue sections were mounted on ChipCytometry chips, pre-treated with antigen retrieval buffer and Sudan Black B solution, and stained with fluorophore-conjugated antibodies as indicated. **a)** Tissue sections were incubated with the same antibody mix and analyzed after the indicated incubation times at 4°C. **b)** Tissue sections were incubated with fluorophore inactivation buffer (PBS, 24 mM NaOH, 4.5% H<sub>2</sub>O<sub>2</sub>) at the indicated incubation times. Images were acquired and fluorescence intensity quantified for each crypt. **c)** Representative images before and after fluorophore inactivation. **d)** Tissues sections were stained with two rounds of antibody cocktails. Chemical bleaching was performed between the two cycles. Shown are representative images before and after chemical bleaching, showing the feasibility of the method in ChipCytometry HMTI. In a) and b) data are depicted as interquartile ranges, with whiskers extending to 10% and 90% and outliers plotted as dots.

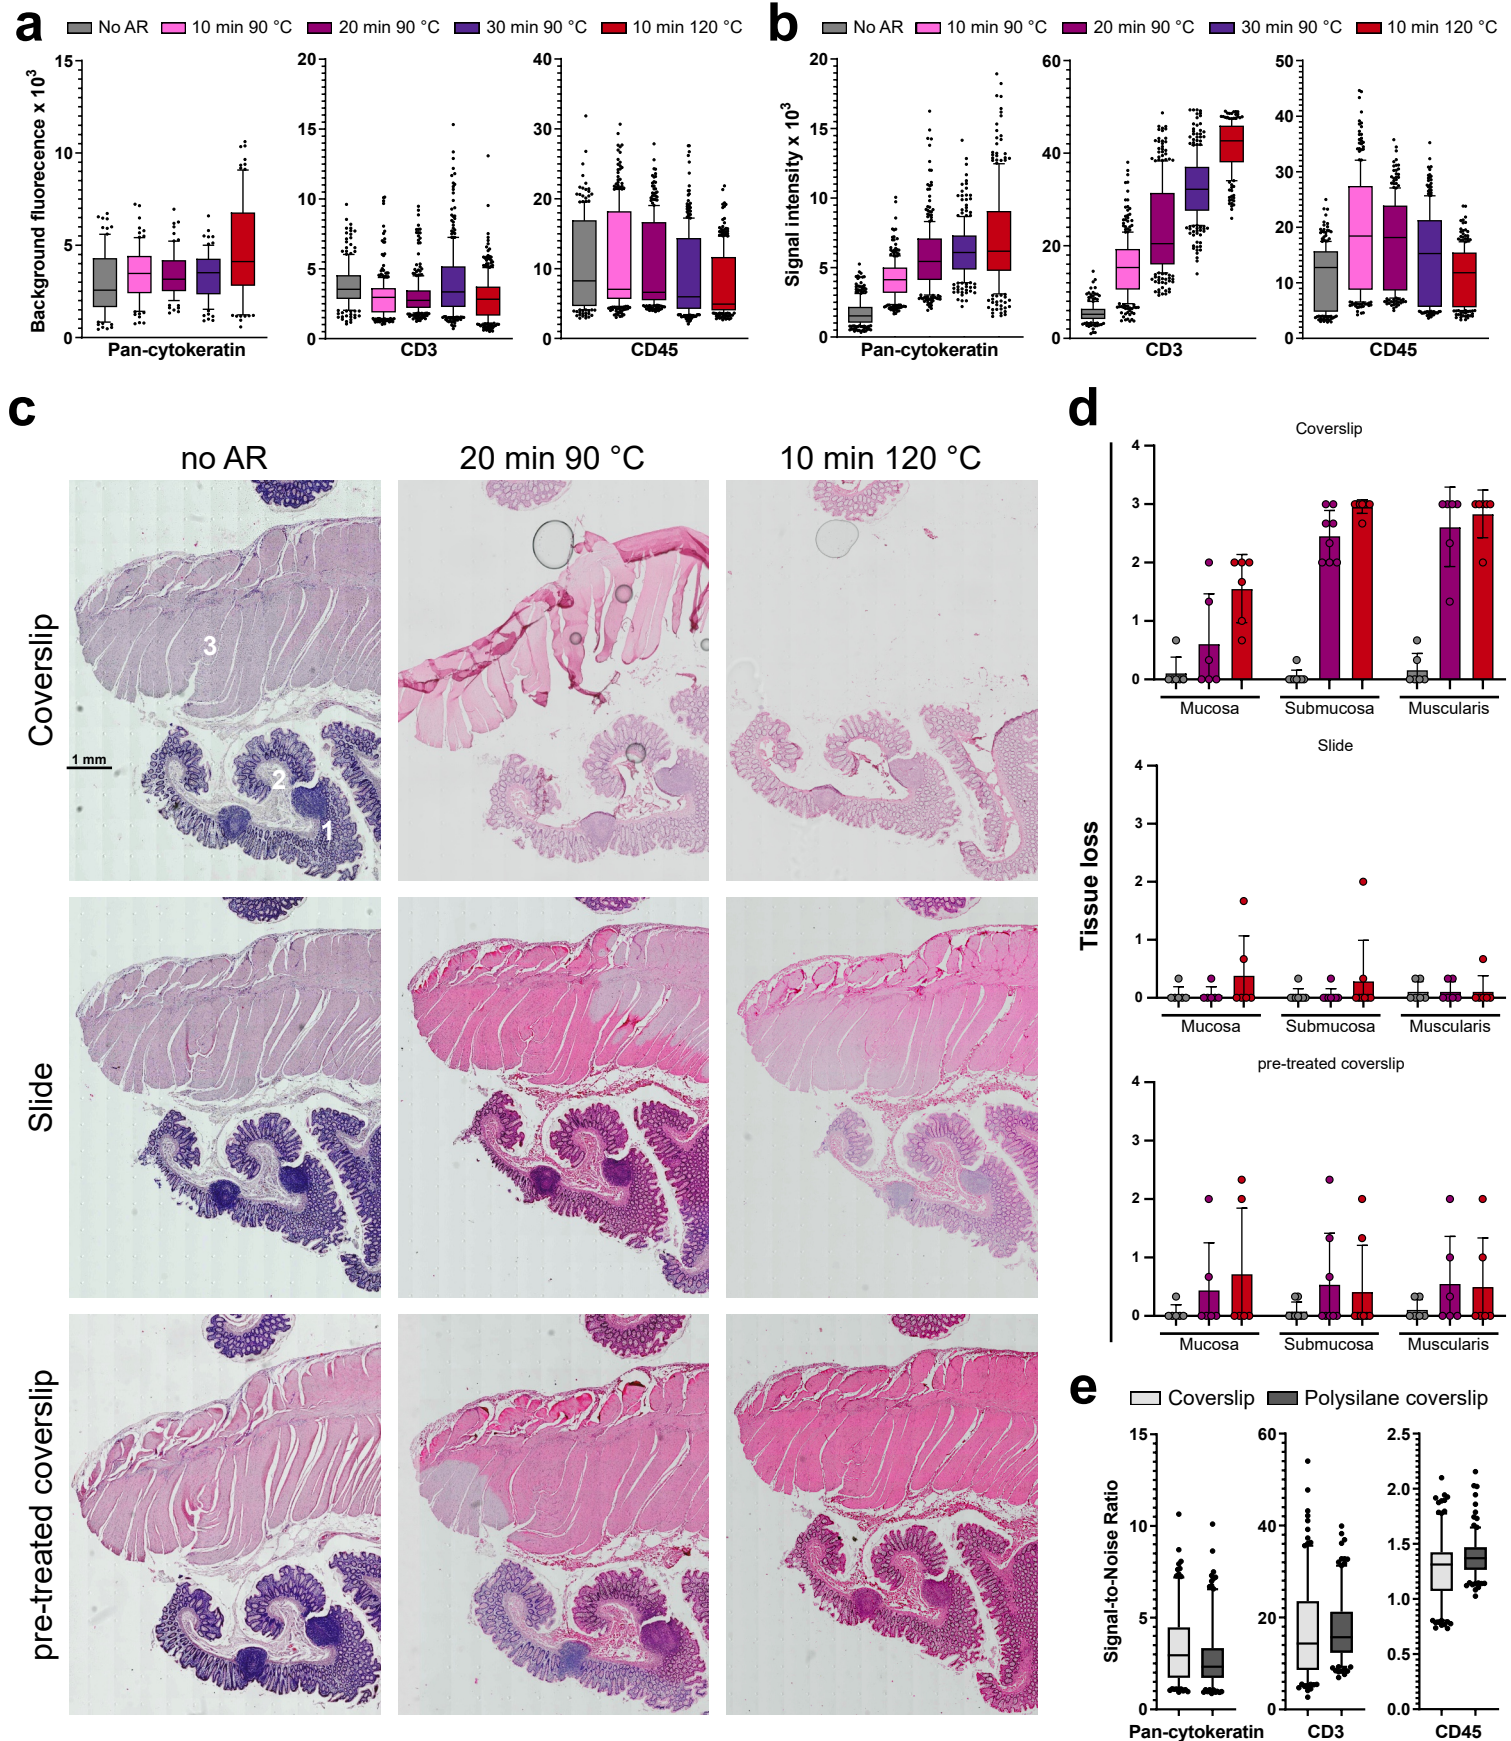

**Figure S2. Effects of different antigen retrieval methods and coverslips on tissue integrity and staining intensity (related to Figure 1).** **a-b)** Healthy colon tissues were treated with different antigen retrieval (AR) methods and background images were acquired prior staining. Background (a) and signal (b) intensities were quantified for individual crypts (pan-cytokeratin staining) or cells (CD3/CD45 staining) for 8 positions per section. Data are depicted as interquartile ranges, with whiskers extending to 10% and 90% and outliers plotted as dots of 3 donors from 2 independent experiments. **c-e)** Healthy colon tissues were mounted on different types of coverslips/slides and treated with different AR methods. **c)** Hematoxylin and Eosin staining of consecutive tissue sections. Numbers indicate regions of mucosa (1), submucosa (2) and muscularis (3). **d)** Scoring of tissue loss (0 = no tissue integrity loss, 3 = complete loss of the tissue). Data are shown as mean  $\pm$  standard deviation. **e)** Quantification of signal-to-noise ratio for 20 min 90 °C antigen retrieval comparing conventional and pre-treated coverslips. Data are depicted as interquartile ranges, with whiskers extending to 10% and 90% and outliers plotted as dots. Individual crypts (pan-cytokeratin staining) or cells (CD3/CD45 staining) were quantified for 8 positions per section.



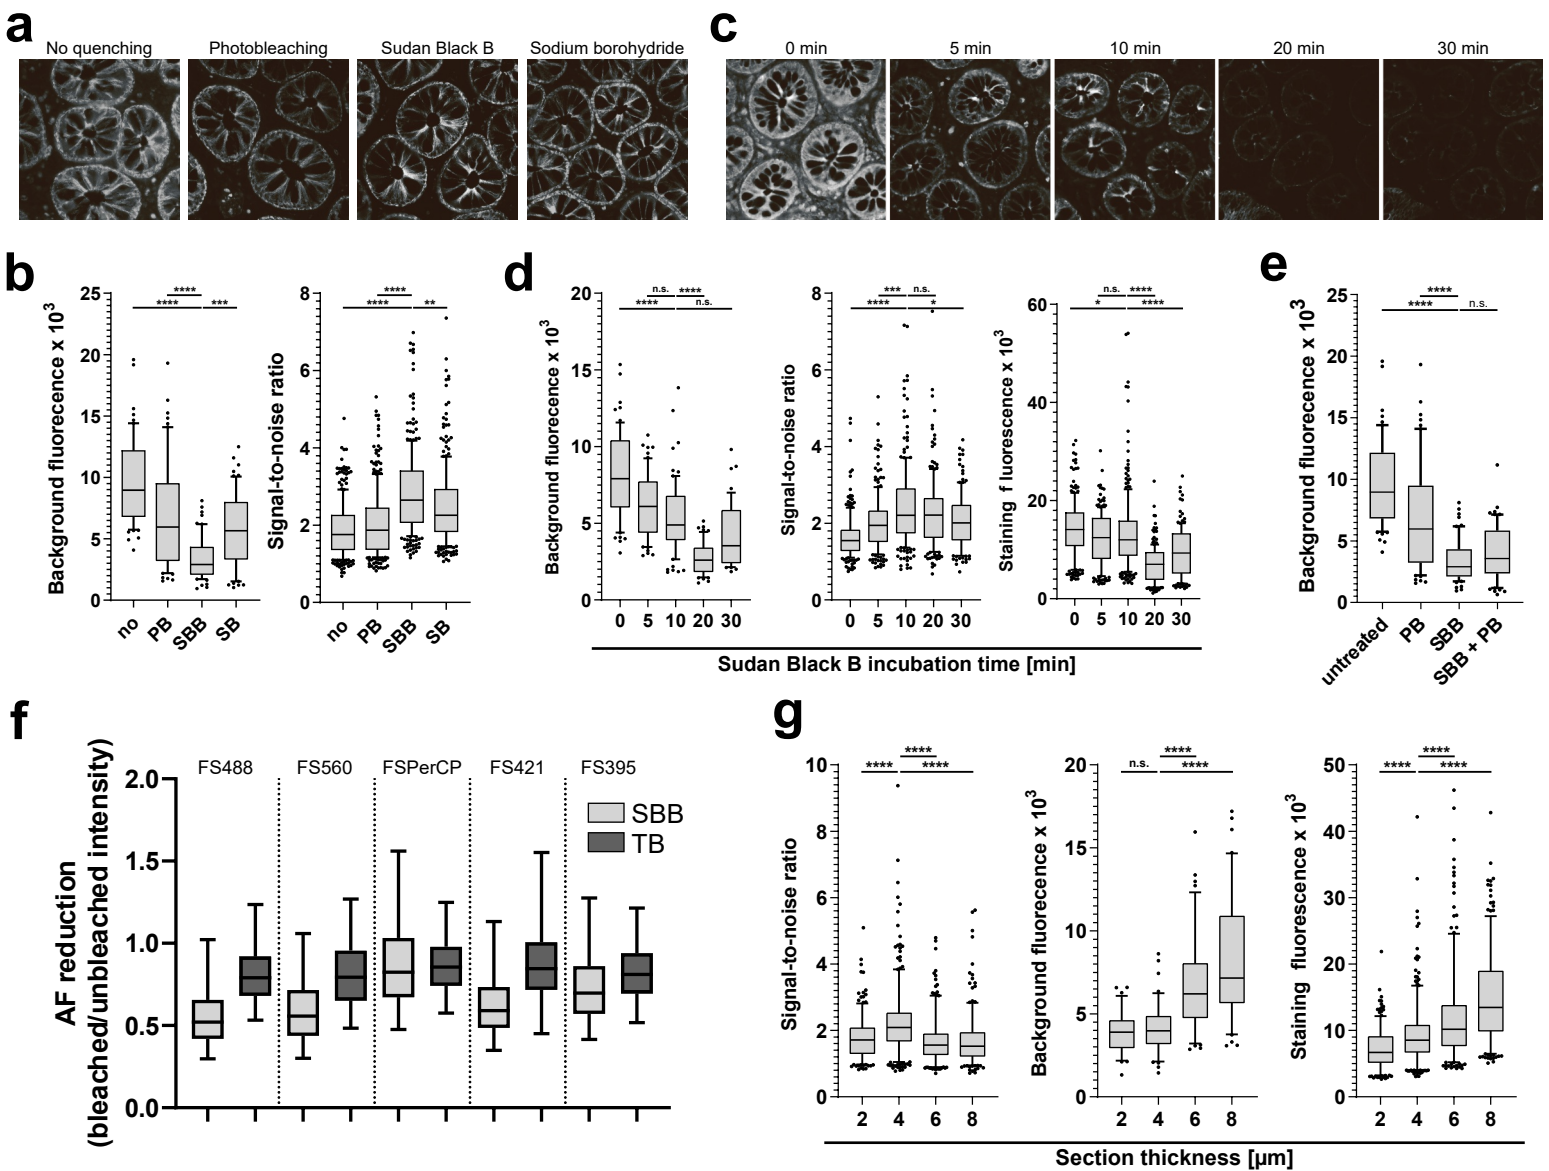

**Figure S3. Selection of treatment for optimal autofluorescence reduction (related to Figure 1).** **a-b)** Healthy colon sections received different treatments for autofluorescence reduction, and images showing crypt autofluorescence were acquired (a). Background (dark areas) and signal (pan-cytokeratin staining) intensities were quantified. Signal-to-noise ratio was calculated as crypt staining/background ratio (b). **c-d)** Healthy colon sections were treated with Sudan Black B solution for different incubation times. Representative images of crypt autofluorescence (c) and quantification of background (black areas), staining fluorescence (pan-cytokeratin staining) and signal-to-noise ratio (d) are shown. **e)** Combinatory effect was tested for Sudan Black B and photobleaching treatment. **f)** Comparison of bleaching capacity between Sudan Black B and True Black. **g)** Healthy colon samples were cut at different section thickness, pre-treated with Sudan Black B solution for 10 minutes and stained for pan-cytokeratin. Non-epithelial tissue parts were quantified as autofluorescence background. Background, staining fluorescence and signal-to-noise were quantified and calculated for the different section thicknesses. In figure b-d), f) and g), data are pooled from 3 donors and 2 independent experiments, and depicted as interquartile ranges (whiskers extending to 10% and 90% and outliers plotted as dots). 8 positions per section were analyzed. Statistical testing was conducted by Tukey's test followed by Dunn's multiple comparisons test (\* $p < 0.05$ ; \*\* $p < 0.01$ ; \*\*\* $p < 0.001$ ; \*\*\*\* $p < 0.0001$ ). PB = Photobleaching, SBB = Sudan Black B, SB = Sodium borohydride, TB = True Black.

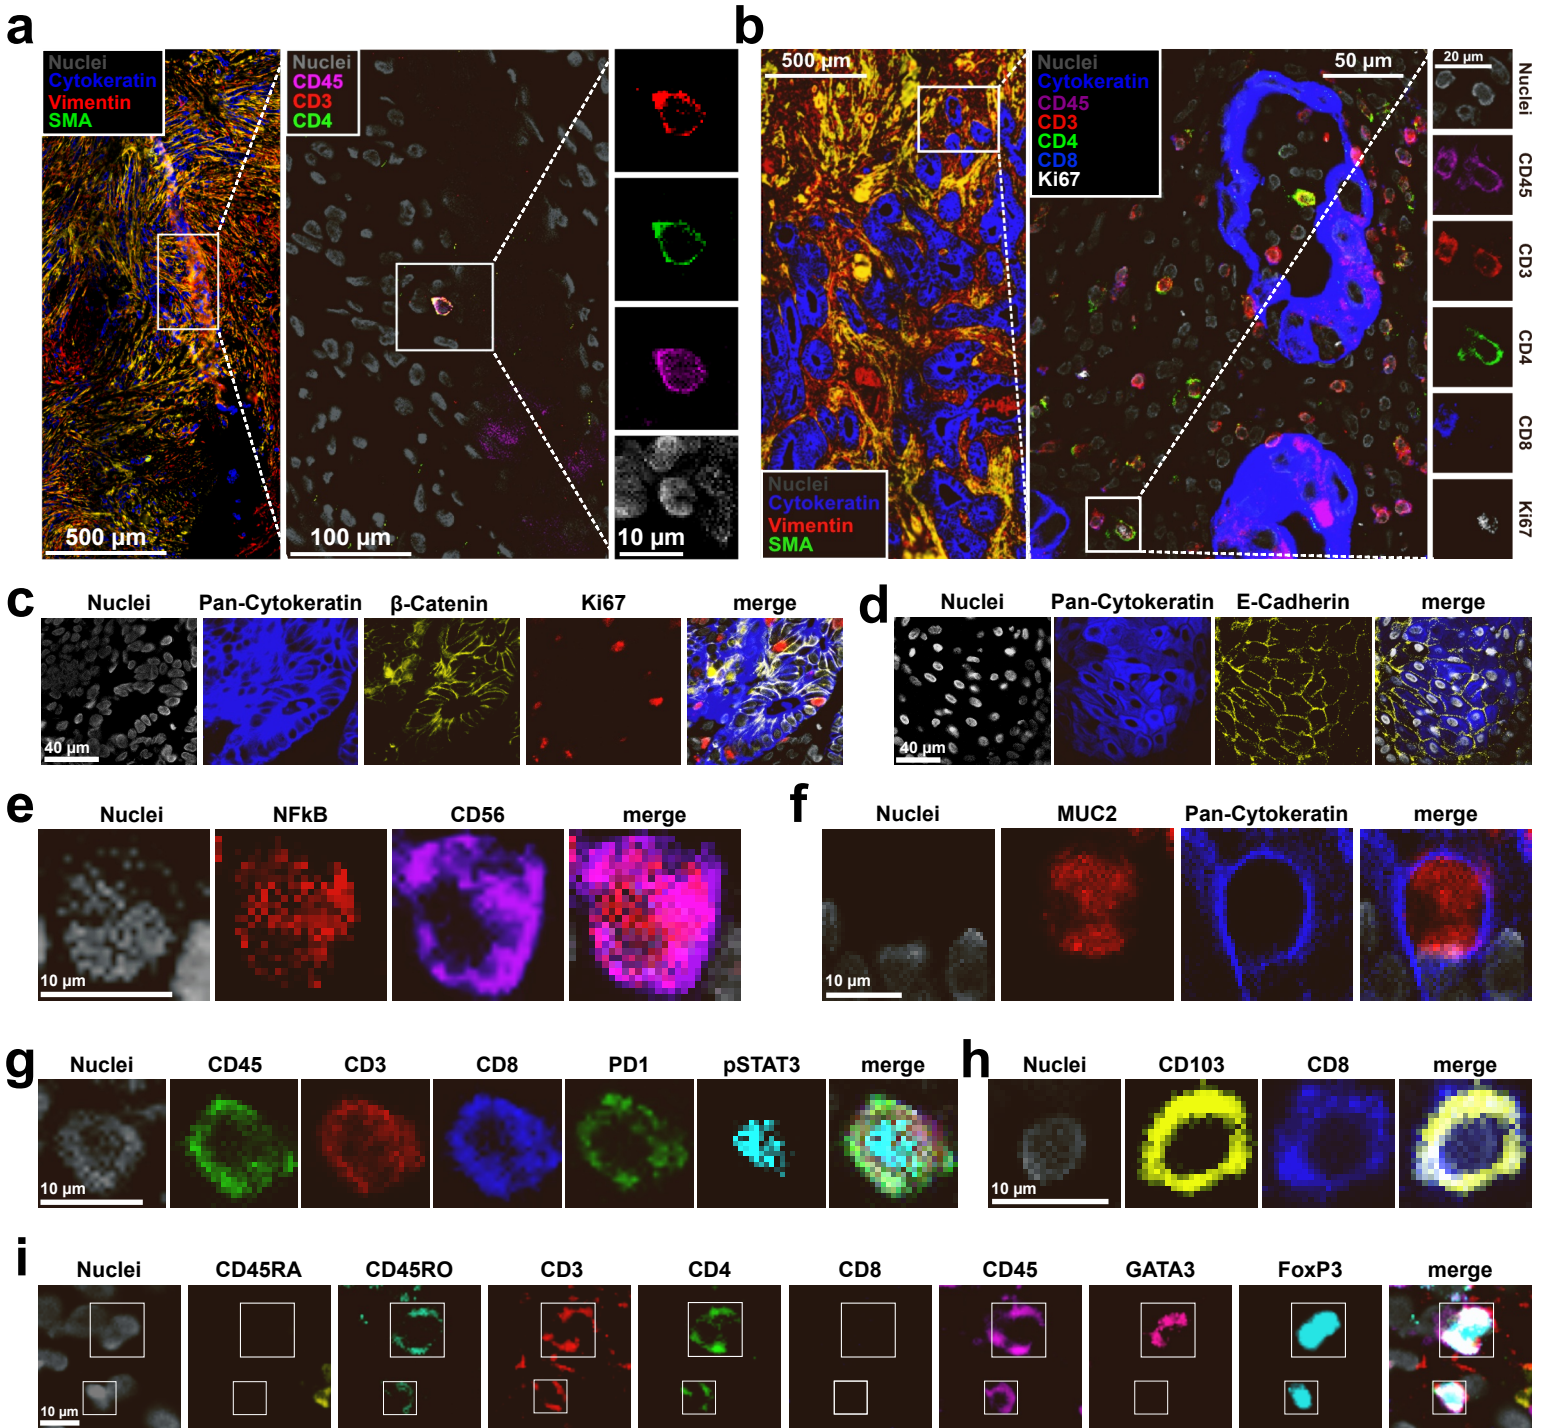

**Figure S4. High-quality multiplexed staining of FFPE tissues with ChipCytometry (related to Figure 2).** **a-b)** Multiplex ChipCytometry overlay of a human breast tissue with low immune infiltrate (number of markers = 6) (a) and a colorectal cancer tissue (number of markers = 10) (b). **c-d)** Representative images of staining of epithelial markers (pan-cytokeratin,  $\beta$ -catenin and E-Cadherin) in cancer tissue sections. **e-i)** Individual cells from colorectal cancer tissue sections. **e)** NF-kB expressing NK cell (CD56+), **f)** MUC2 expressing goblet cell in the epithelial compartment, **g)** pSTAT3 expressing CD8+ T cell, **h)** CD103 positive CD8+ tissue resident memory (TRM) cell. **i)** GATA3+ (upper cell) and GATA3- (lower cell) regulatory T cells in an inflamed human colon tissue.



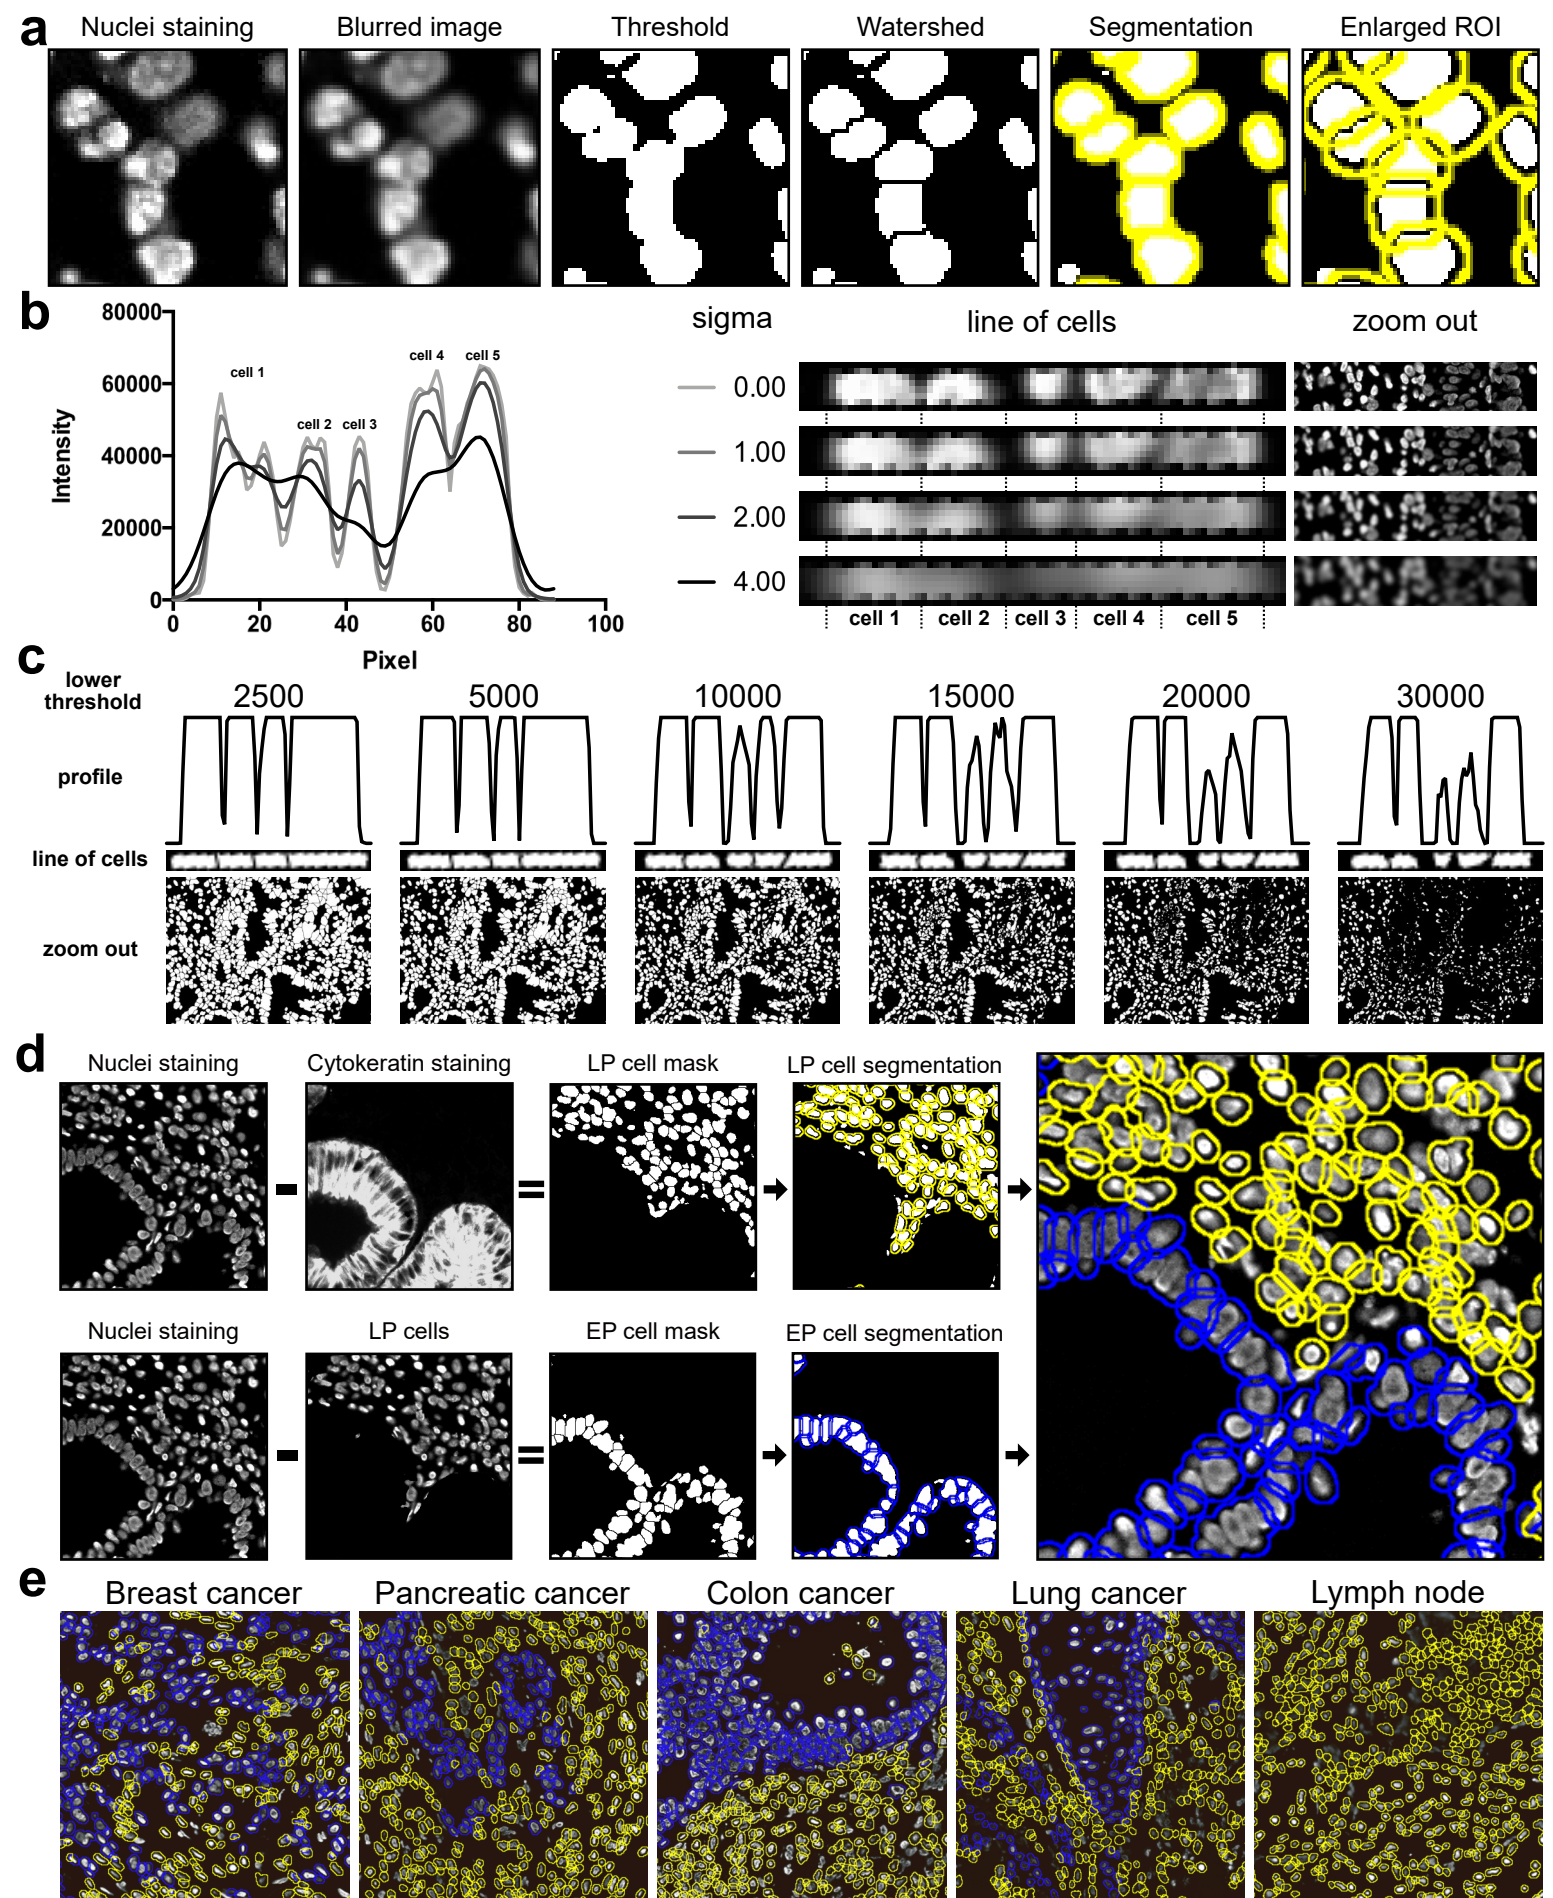

**Figure S5. Cell segmentation via nuclei staining (related to Figure 3).** **a)** Image series of a selected area from a nucleus staining depicting each step of the segmentation pipeline. **b)** The sigma value (intensity of blurring) was titrated. The intensity profile of 5 cells in a row (left) shows the separation of cells by the minima and maxima of the curves for different sigma values, with a clear smoothing of the curves with increasing sigma values. The corresponding images (middle) and the selected regions (right) depict visible differences between sigma values for the applied Gaussian blurring. A sigma value of 1 showed a good compromise between cell separation and reduction of intranuclear intensity differences. **c)** The watershed algorithm on the binary image allows, together with an increased lower threshold, to separate overlapping cells. Threshold titration shows how neighboring cells can be divided according to an optimal threshold value (10.000), above which proper cell segmentation is lost. **d)** Healthy colon tissues were stained with pan-cytokeratin. Either pan-cytokeratin staining (epithelial cells, EP) or nuclear staining of lamina propria (LP) cells was subtracted to the image prior to cell segmentation. **e)** Exemplary images of separate segmentation in different tissues types. Blue = segmented epithelial cells, yellow = segmented non epithelial cells.

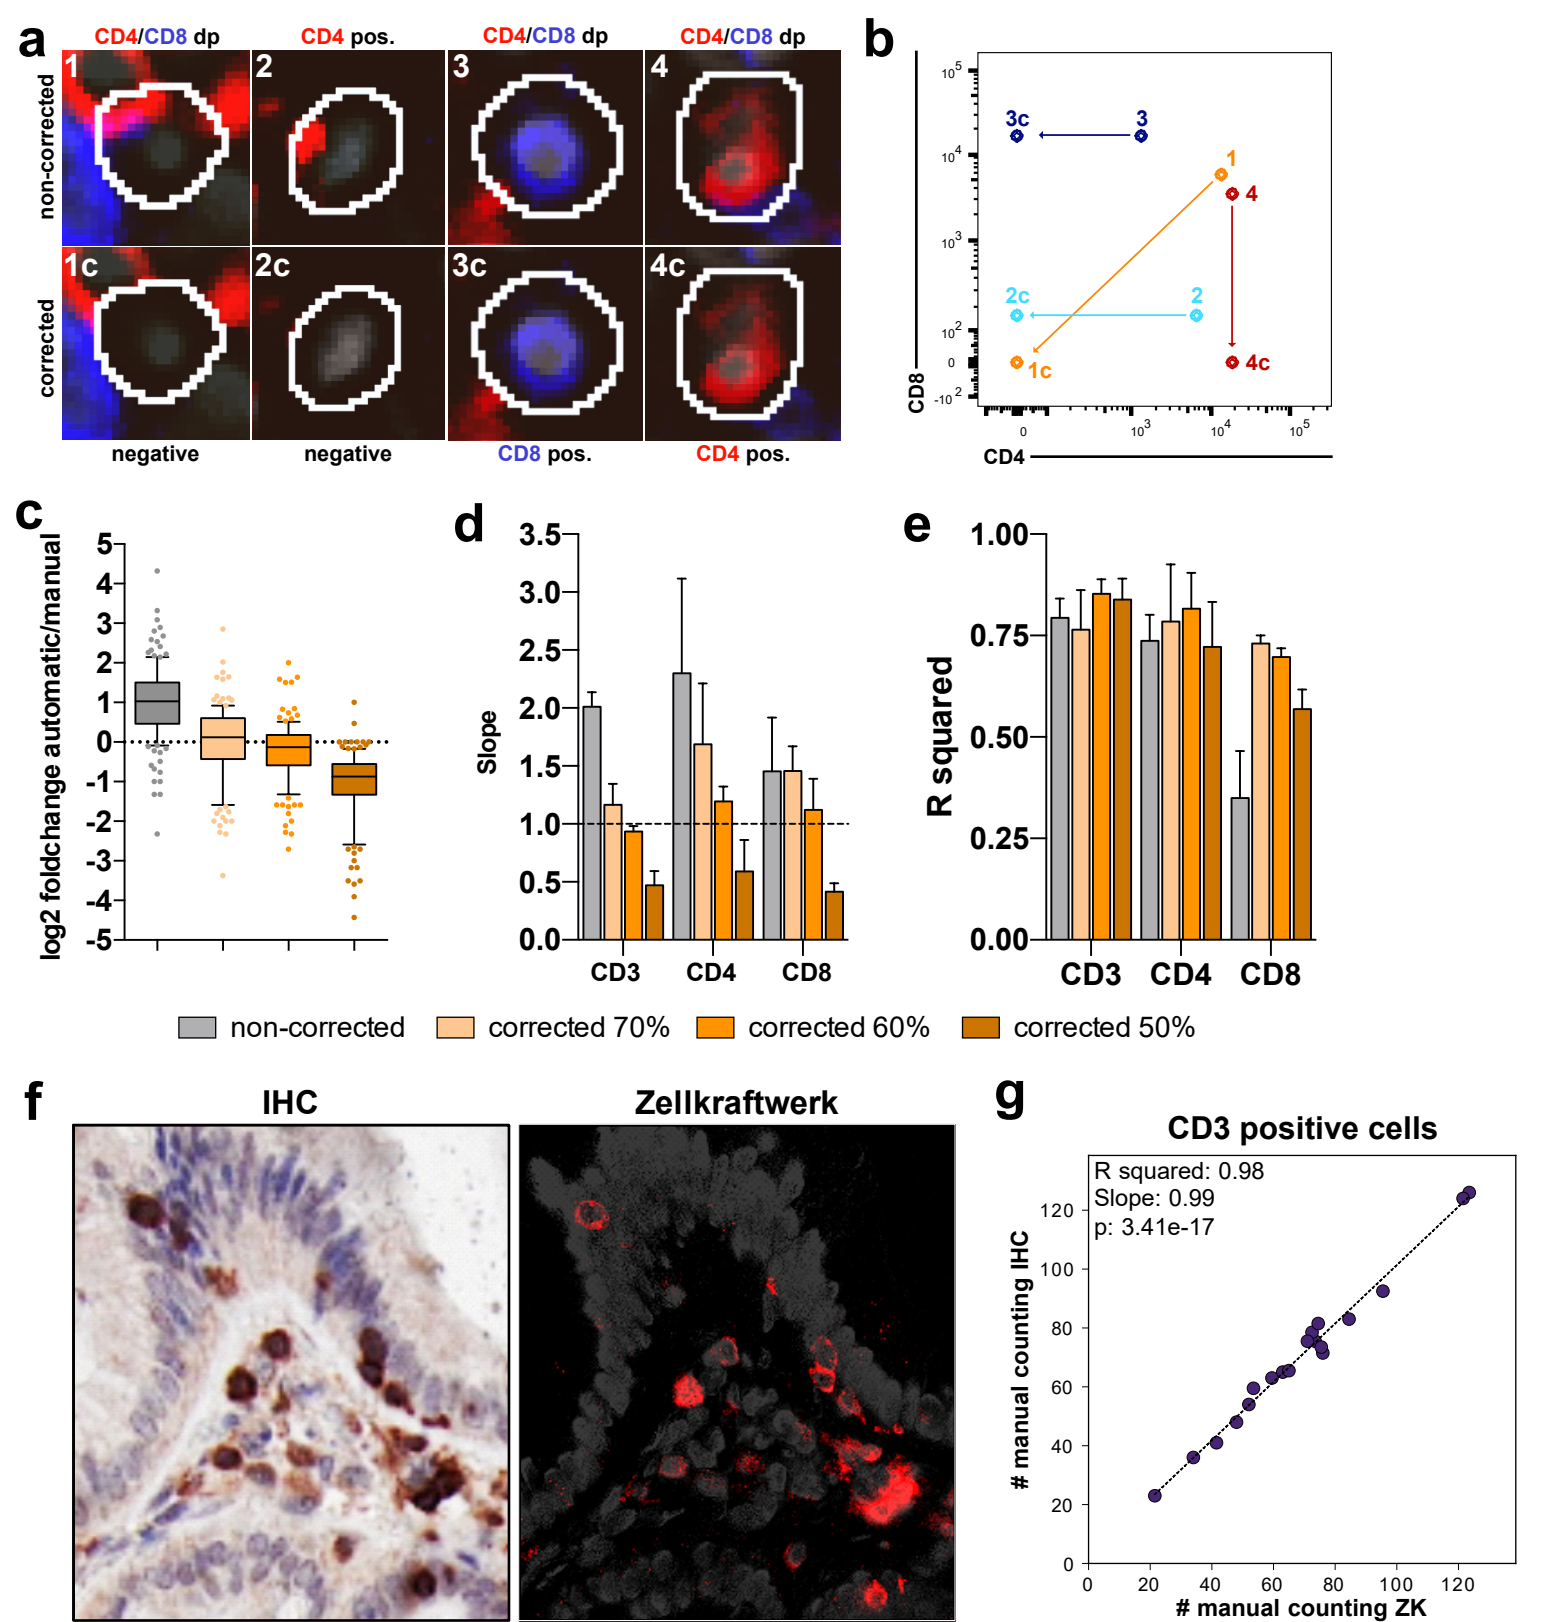

**Figure S6. Titration of threshold value for optimal spatial spillover correction (related to Figure 3).** **a)** Representative images to visualize the effect of spatial spillover correction. **b)** Cells shown in **a)** are plotted according to CD4/CD8 intensity values before (1-4) and after (1c-4c) spatial spillover correction. **c-e)** Cells positive for CD3, CD4 or CD8 staining were quantified via automated quantification according to different spillover thresholds or manual counting. Manual and automated cell counts were finally correlated. Shown are the fold change (**c**), the slopes (**d**) and the R squared values (**e**) for the correlation between automatic quantification with different spillover corrections vs. manual counting. **f)** Representative images of CD3 staining by ChipCytometry (left) and IHC (right) on the same tissue section. **g)** Correlation between manual quantification of ChipCytometry and IHC CD3 staining. Data in **c)** are depicted as interquartile ranges (whiskers extending to 10% and 90% and outliers plotted as dots) whereas data in **d)** and **e)** are expressed as mean  $\pm$  SD for three donors.

**Table S1. Human subject characteristics (related to STAR Methods)**

|           | <b>Description</b>                           | <b>Disease</b>                   | <b>Anatomical localization</b> | <b>Stage</b>                                             | <b>Age</b> | <b>Sex</b> |
|-----------|----------------------------------------------|----------------------------------|--------------------------------|----------------------------------------------------------|------------|------------|
| <b>1</b>  | healthy adjacent tissue from colon resection | Adenocarcinoma                   | Rectum                         | TNM-stage (IUICC/AJCC): IIIB                             | 70         | male       |
| <b>2</b>  | healthy adjacent tissue from colon resection | Colon cancer                     | Colon                          | no information                                           | 66         | male       |
| <b>3</b>  | healthy adjacent tissue from colon resection | Adenocarcinoma                   | Sigma                          | TNM-stage (IUICC/AJCC): IIA                              | 77         | female     |
| <b>4</b>  | biopsy from aHSCT patient                    | GvHD                             | Duodenum                       | Lerner Grade III                                         | 67         | male       |
| <b>5</b>  | biopsy from aHSCT patient                    | GvHD                             | Caecum                         | Lerner Grade II                                          | 55         | male       |
| <b>6</b>  | Colorectal cancer resection                  | adenocarcinoma                   | Caecum                         | TNM UICC-Klassifikation: T3, N0, M0. Stage IIA           | 85         | male       |
| <b>7</b>  | Colorectal cancer resection                  | adenocarcinoma                   | Caecum                         | TNM UICC-Klassifikation: T3, N2a, M1a. Stage IVA         | 69         | male       |
| <b>8</b>  | Colorectal cancer resection                  | adenocarcinoma                   | Colon ascendens                | TNM UICC-Klassifikation: T3, N0, M0. Stage IIA           | 100        | male       |
| <b>9</b>  | Colorectal cancer resection                  | adenocarcinoma                   | Caecum                         | TNM UICC-Klassifikation: T3, N0, M0. Stage IIA           | 81         | female     |
| <b>10</b> | Colorectal cancer resection                  | adenocarcinoma                   | Rectum                         | TNM UICC-Klassifikation: T3, N2b, M1. Stage IVA          | 75         | Male       |
| <b>11</b> | Pancreatic cancer resection                  | ductal adenocarcinoma            | pancreas                       | TNM UICC-Klassifikation: T2, N1, M0, stage IIB           | 62         | Male       |
| <b>12</b> | Pancreatic cancer resection                  | ductal adenocarcinoma            | pancreas head                  | TNM UICC-Klassifikation: T3, N2, M0, stage III           | 80         | Male       |
| <b>13</b> | Pancreatic cancer resection                  | ductal adenocarcinoma            | pancreas                       | TNM UICC-Klassifikation: T3, N2, M0, stage III           | 71         | Male       |
| <b>14</b> | Pancreatic cancer resection                  | ductal adenocarcinoma            | pancreas head                  | TNM UICC-Klassifikation: T4, N2, M0, stage III           | 67         | Male       |
| <b>15</b> | Pancreatic cancer resection                  | ductal adenocarcinoma            | pancreas                       | TNM UICC-Klassifikation: T4, N2, M0, stage III           | 73         | Male       |
| <b>16</b> | Breast cancer resection                      | invasive lobular mammarcarcinoma | Mammaabladat left              | TNM UICC-Klassifikation: pT4b, pTis, pN3, M0. Stage IIIC | 55         | female     |



**Table S2. Filter sets used for ChipCytometry (related to STAR Methods)**

| <b>Filterset</b> | <b>Excitation</b> | <b>Emission</b> | <b>Filter Excitation</b> | <b>Filter Emission</b> |
|------------------|-------------------|-----------------|--------------------------|------------------------|
| FS395            | 364 nm – 366 nm   | 381 nm – 403 nm | 365/2                    | 392/23                 |
| FS421            | 370 nm – 410 nm   | 440 nm – 485 nm | 390/40                   | 460/50                 |
| FS488            | 450 nm – 490 nm   | 500 nm – 550 nm | 470/40                   | 525/50                 |
| FS560            | 525 nm – 575 nm   | 570 nm – 640 nm | 550/25                   | 605/70                 |
| FSPerCP          | 456 nm – 484 nm   | 672 nm – 748 nm | 435/40                   | 710/75                 |
| ALL (Bleach)     | 390 nm – 644 nm   | -               | 364LP                    |                        |
